# Supplementary material for: How did the guppy Y chromosome evolve?
Source: PLoS Genet. 2021 Aug 9;17(8):e1009704. doi: 10.1371/journal.pgen.1009704 (PMC8376059; doi:10.1371/journal.pgen.1009704)
Supplement: S2 Table — B. Microsatellites from other chromosomes were used to determine paternity in M. picta and M. parae families and to infer heterochiasmy in M. picta. (XLSX) [file pgen.1009704.s003.xlsx]

## Sheet: Table S2
S2 Table. Genetic markers used in M. picta and M. parae. A. Chromosome 12 markers used for determining hemizygosity in M. picta, M. parae and M. bifurca males. Most primers were designed based on the guppy female assembly, but blue font indicates microsatellites that were designed from the male assembly. B. Microsatellites from other guppy chromosomes were used to determine paternity in M. picta …
Chromosome	Marker name	Position in guppy genome assembly (Mb)*	Forward primer	Reverse primer	Genotyping method
A
12	GT235	2.1	TTTTTCATGCTCTTGTGTGCGTGTG	ACAATCAGCTCAACACCTGGAGATCG	microsatellite, capillary electrophoresis
12	GT261	3.1	CACATGGATAGACACCTCACAGAGC	GGGTTTGTTCTGCAGACAGTGAGC	microsatellite, capillary electrophoresis
12	AG163	4.9	TACTTGCCGATGTGAGGACAAGC	GATAATCTCACCTGCTGTTTGAGGTG	microsatellite, capillary electrophoresis
12	AC618	5	TTC TGG TTT CGA ACG GTC TGG TCC	CTC TGG TGT TAA AAT GGA CGC TGG	microsatellite, capillary electrophoresis
12	AG169	7	TAGACGCTCTGAAACCTTCAAATGC	GAAAGACGAAAGATGATTCGCAGC	microsatellite, capillary electrophoresis
12	ATA1017	8.6	TAT TGT TCG CAG CCT ACA GTG C	ATC CCA ACC AAA CTC CAT ACA CAA GC	microsatellite, capillary electrophoresis
12	GT1046	9.1	ACA ATT GTC AGC TTG GCT GAC C	TGT TCA CCT CAC ATC TGC GAT GG	microsatellite, capillary electrophoresis
12	CA1148	10.1	AAG CAC AGA GTT TCC TTG AAG GGC	ACC TTC ATG TAT CCT TCA CGT ATC CGC	microsatellite, capillary electrophoresis
12	TAGA1182	10.5	AAT ACG GTC TTC CTC CTG AGA GC	CCC TTT AAA AGC TAA GAT GTG GCT GC	microsatellite, capillary electrophoresis
12	AC552	11.7	GTAGAGTCCCACTGCTCTATCGTGTGG	TCCATTACTTTGGAATTGGGTGAGCG	microsatellite, capillary electrophoresis
12	AG177	14.4	AGCAATGAATGAGTGACTGGCTGG	CGCATGTCGTGCATATCAGCAC	microsatellite, capillary electrophoresis
12	AG179	15.4	CACCTCAGTCTCAAATCTGTTGCAG	CACTGTGAAGCATATAGTAGTGGCAGC	microsatellite, capillary electrophoresis
12	AC639	21.2	GTAACACACACAGATCCCGCAGG	TCCTGTTTGATTGTGTGTGAGACGC	microsatellite, capillary electrophoresis
12	CTT97	22.8	GAGACTCAGATCCAACTGTTTACAGG	ATAAATCTGCGCCAACCAAACTGG	microsatellite, capillary electrophoresis
12	GT350	24.5	AAATAAAGGTGCGCAACGATCC	TGCAGTCGACTTGATGCTCTCC	microsatellite, capillary electrophoresis
12	GT369	25.3	AAGCAATGGCAAAGTGTGGGAAGG	AACCACCGTGTTCATGGGCAGACTG	microsatellite, capillary electrophoresis
12	zer1	26.2	CGTTCTGTCTCACATCATGTTCGACGG	TAAACCGACACCAGGTTGTAGAGCG	sequencing, capillary electrophoresis
12	fpgs	26.3	ATACTTCTGGCAGGTTTACGGACGGC	AAGATGGTGAGGAACCGGAAGTACG	sequencing, capillary electrophoresis
B
1	CT39	16.3	TCTGCTAGTCCATACGTAGGTCC	CAGACTCTATTTCGCACAAGTGCAG	microsatellite, capillary electrophoresis
7	GT288	17.7	AGTTCTGCAGCAGTGCTGTAAAGG	AGAAGAAGAAGTGTCAGAGTGAGACGC	microsatellite, capillary electrophoresis
9	GT413	4.7	CAGATATTGTCTCCATAGAAACCAGC	GATGTCTATACACCCAGAGGGAAGC	microsatellite, capillary electrophoresis
9	CT278	8.1	CTGCAGGACCTCAATAAGACCTTCC	AAGGTCCACTTGAGTGGCTTCACC	microsatellite, capillary electrophoresis
9	GT512	14.7	GCATGTGTGACTGAATGTGTGC	AAAAGGCTCACACTGAGGGCAAGC	microsatellite, capillary electrophoresis
9	CT295	20.1	ACAGCACAGACATGCTTGAAACCTCC	TCAGGCTCTAGTGCTGTTGACAGG	microsatellite, capillary electrophoresis
9	AG357	25.4	GATATGCGTGATCAATCTGG	CTGACTGTATCAAGCAAACCAAGG	microsatellite, capillary electrophoresis
9	AAG6	30.8	CTACACACTCGTGTATAGTAGGTGGC	TGTCCCCAGGTGAAGCTTTGAACC	microsatellite, capillary electrophoresis
9	GT639	27	AACCTTGTTGTGCGTTAAAGCTTCC	AGCTGCGAAGGAAAGCTGATGG	microsatellite, capillary electrophoresis
9	CT304	26.9	AGCTGCCTCTCTATGATCTCTTGAGC	CATCAGAGGCTTGCAGAGAAGAGC	microsatellite, capillary electrophoresis
9	GT737	33.9	ATCATCGTTTCTGCTGCTGCAG	CTTGTGACCCAGAACAACAGACG	microsatellite, capillary electrophoresis
18	AC540	22	GTGAAAGCGTGTCGTACCTGCAG	AGGAGGATTGAAACGTGTGTCTGC	microsatellite, capillary electrophoresis
18	GT310	21.4	GAGAGTTTAATGGAGGTTCAGAGGAG	GGACGTCATCTGTGATTTCAGCC	microsatellite, capillary electrophoresis
* Based on assembly version GCF 000633615.1, available at https://www.ncbi.nlm.nih.gov/assembly/GCF_000633615.1/
